# Supplementary material
Source: HighWire-hosted journal article supplement (http://ajnr-stage2.highwire.org/highwire/filestream/90588/field_highwire_adjunct_files/0/0689.pdf)
Supplement: 0689.pdf [file 0689.pdf]

| Participants<br>(N°) | Sex<br>(M/F) | Age<br>(Years) | Side<br>(R/L) | Initial<br>localization<br>and extent<br>(STAM<br>classification) | Surgical<br>technique<br>(CWU/CW<br>D) | Initial<br>surgery –<br>MRI 1<br>(Months) | Initial<br>surgery–<br>MRI 2<br>(Months) | Initial<br>surgery–<br>MRI 3<br>(Months) | Initial<br>surgery–<br>MRI 4<br>(Months) | Initial<br>surgery–<br>MRI 5<br>(Months) | Revision<br>surgery<br>(Y/N) | Grounds<br>for surgery     | Initial<br>surgery–<br>revision<br>surgery<br>(Months) | Residual<br>cholesteatoma<br>(Y/N) and size<br>(mm, if<br>applicable) |
|----------------------|--------------|----------------|---------------|-------------------------------------------------------------------|----------------------------------------|-------------------------------------------|------------------------------------------|------------------------------------------|------------------------------------------|------------------------------------------|------------------------------|----------------------------|--------------------------------------------------------|-----------------------------------------------------------------------|
| 1                    | M            | 14             | L             | A/T/S2 - stage 2                                                  | CWU                                    | 14                                        | 25                                       |                                          |                                          |                                          | Y                            | Residual<br>suspicion      | 28                                                     | Y (8×5)                                                               |
| 2                    | F            | 16             | R             | A/T - stage 2                                                     | CWU                                    | 32                                        | 40                                       | 85                                       |                                          |                                          | Y                            | Residual<br>suspicion      | 85                                                     | Y (20×11)                                                             |
| 3                    | M            | 12             | R             | T - stage 1                                                       | CWU                                    | 16                                        | 28                                       | 69                                       |                                          |                                          |                              |                            |                                                        | N                                                                     |
| 4                    | F            | 7              | L             | T - stage 1                                                       | CWU                                    | 14                                        | 27                                       | 43                                       | 83                                       | 144                                      |                              |                            |                                                        | N                                                                     |
| 5                    | F            | 50             | R             | A/M - stage 2                                                     | CWU                                    | 10                                        | 35                                       | 46                                       |                                          |                                          | Y                            | Conductive<br>hearing loss | 48                                                     | N                                                                     |
| 6                    | F            | 44             | L             | T/M - stage 2                                                     | CWD                                    | 25                                        | 119                                      | 147                                      | 198                                      |                                          |                              |                            |                                                        | N                                                                     |
| 7                    | M            | 35             | L             | A - stage 1                                                       | CWU                                    | 20                                        | 52                                       |                                          |                                          |                                          | Y                            | Residual<br>suspicion      | 58                                                     | Y (11×10)                                                             |
| 8                    | F            | 38             | L             | S1/T/A - stage 2                                                  | CWD                                    | 29                                        | 68                                       |                                          |                                          |                                          |                              |                            |                                                        | N                                                                     |
| 9                    | M            | 13             | R             | T/S2 - stage 2                                                    | CWU                                    | 9                                         | 20                                       |                                          |                                          |                                          |                              |                            |                                                        | N                                                                     |
| 10                   | M            | 79             | L             | T - stage 1                                                       | CWU                                    | 21                                        | 29                                       | 45                                       | 64                                       |                                          |                              |                            |                                                        | N                                                                     |
| 11                   | M            | 6              | L             | S1/T/A - stage 2                                                  | CWU                                    | 13                                        | 37                                       |                                          |                                          |                                          | Y                            | Residual<br>suspicion      | 37                                                     | N                                                                     |
| 12                   | M            | 23             | L             | A/T/M - stage 2                                                   | CWU                                    | 15                                        | 45                                       |                                          |                                          |                                          |                              |                            |                                                        | N                                                                     |
| 13                   | M            | 15             | L             | S2/ M - stage 2                                                   | CWU                                    | 15                                        | 37                                       | 69                                       |                                          |                                          | Y                            | Residual<br>suspicion      | 76                                                     | Y (8×6)                                                               |
| 14                   | F            | 16             | R             | S2/ M - stage 2                                                   | CWU                                    | 16                                        | 50                                       |                                          |                                          |                                          | Y                            | Residual<br>suspicion      | 52                                                     | N                                                                     |
| 15                   | M            | 45             | R             | A/T/M - stage 2                                                   | CWU                                    | 24                                        | 45                                       | 56                                       |                                          |                                          | Y                            | Residual<br>suspicion      | 58                                                     | Y (9×7)                                                               |
| 16                   | M            | 74             | L             | A - stage 1                                                       | CWU                                    | 12                                        | 39                                       |                                          |                                          |                                          | Y                            | Residual<br>suspicion      | 39                                                     | Y (6×5)                                                               |
| 17                   | F            | 27             | R             | A - stage 1                                                       | CWU                                    | 10                                        | 29                                       | 54                                       |                                          |                                          | Y                            | Residual<br>suspicion      | 57                                                     | Y (8×4)                                                               |

Table 1: Clinical, MRI, and surgical findings. F: female; M: male; L: left; R: right; N: no; Y: yes; STAM Classification (EAONO 2016): S1: protympanum; S2: retrotympanum; T: mesotympanum; A: attical; M: mastoid; stage 1: one location; stage 2: two locations; CWU: canal wall-up; CWD: canal wall-down with reconstruction

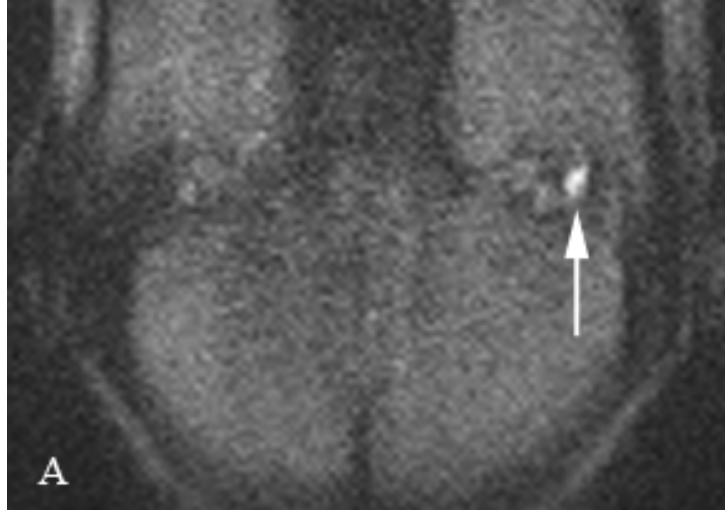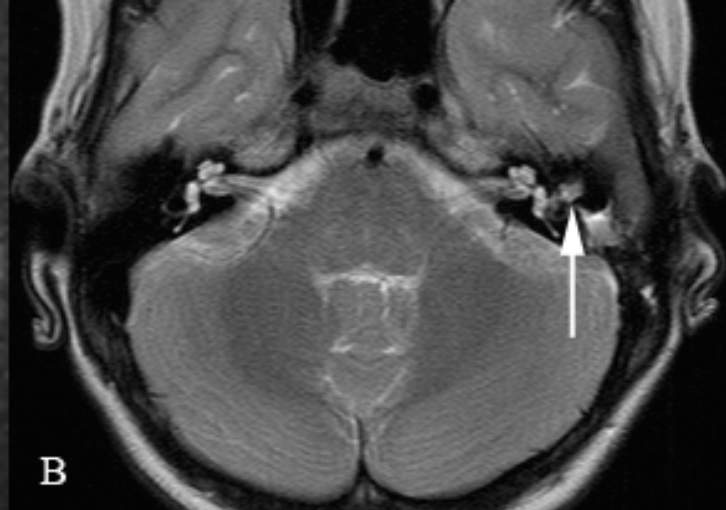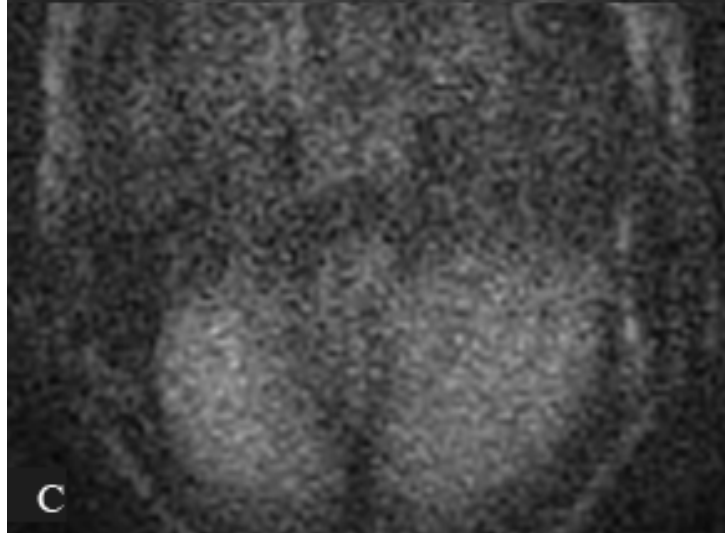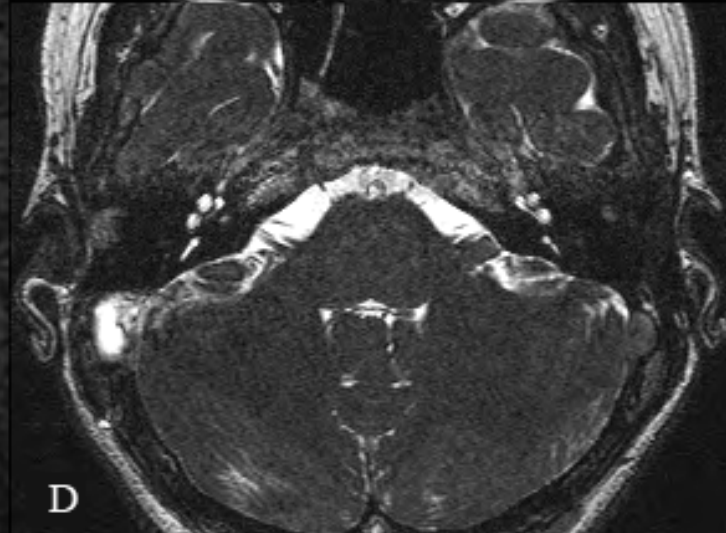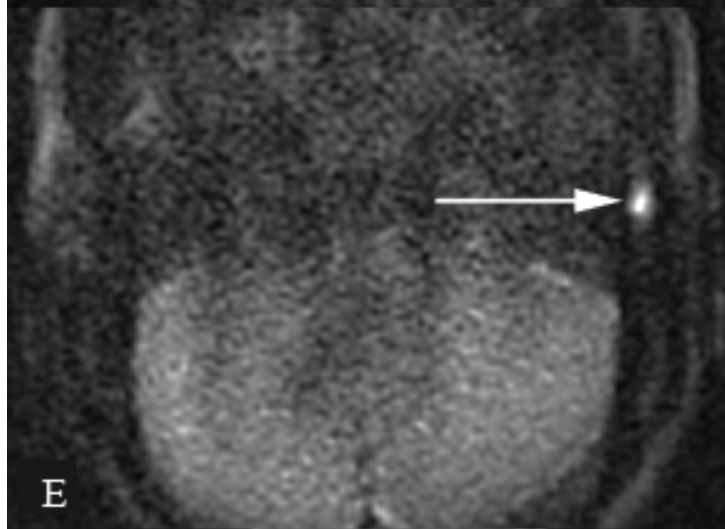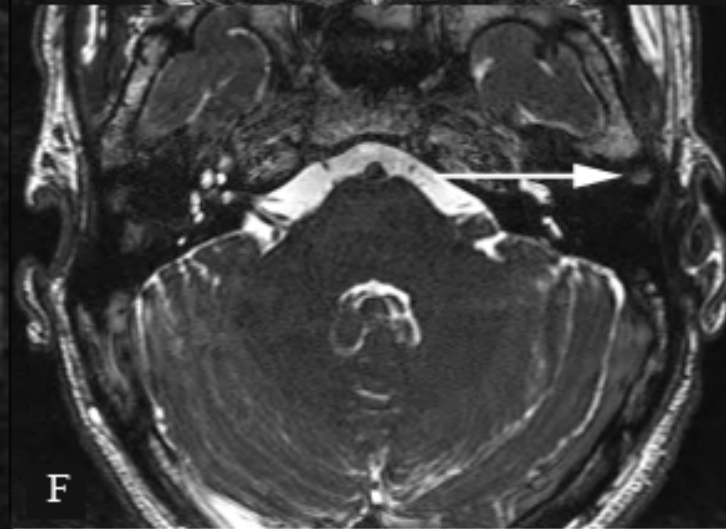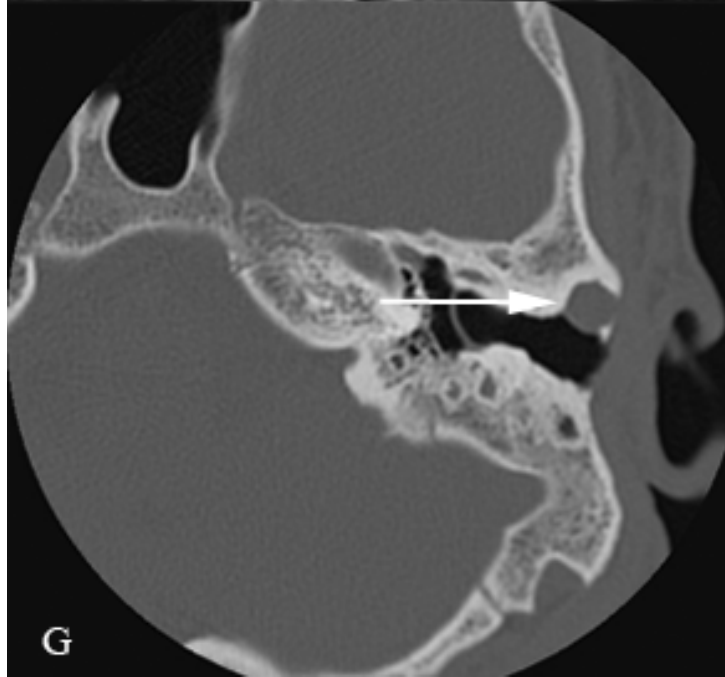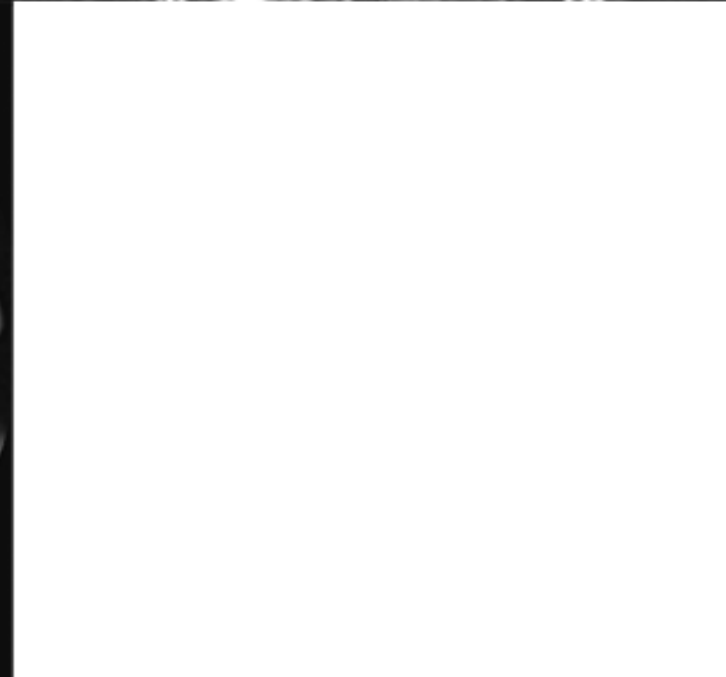

Supplemental material 1 : Example of MRI follow-up of patient 13 (male, 15 years-old, with history of left-sided cholesteatoma)

A and B: non-EPI DWI showing restriction (A, arrow) in the epitympanum with a hyperintense signal on axial T2 imaging (B, arrow) prior to initial surgery. C, D: DWI and T2 imaging performed 15 months after initial surgery indicating a low risk of residual cholesteatoma. E, F and G: Axial DWI (E,F) and CT scan (G) performed 69 months after the initial surgery providing evidence of a residual cholesteatoma, measured 8x6mm (arrows).

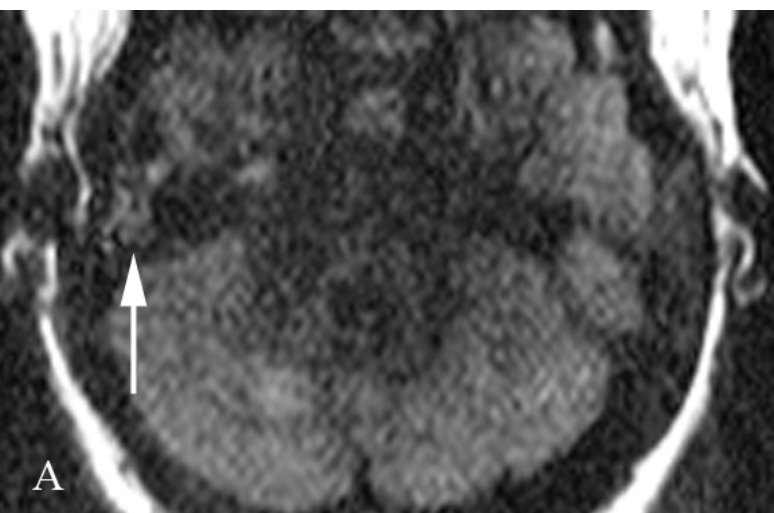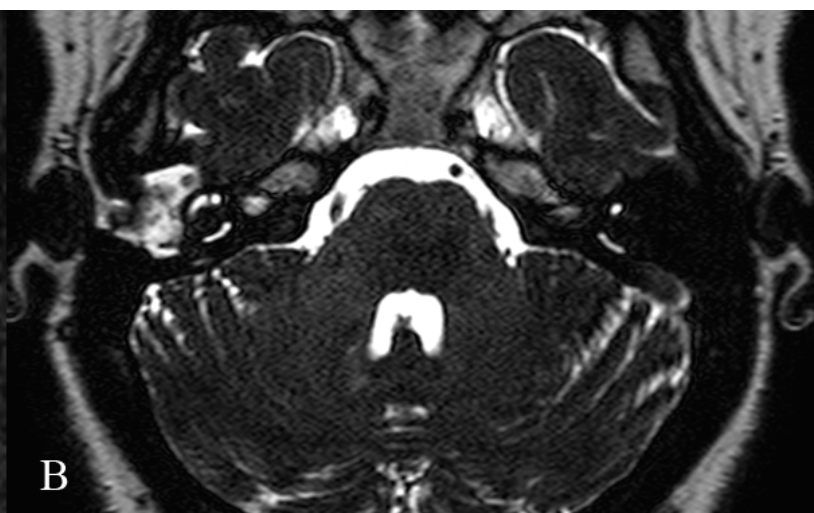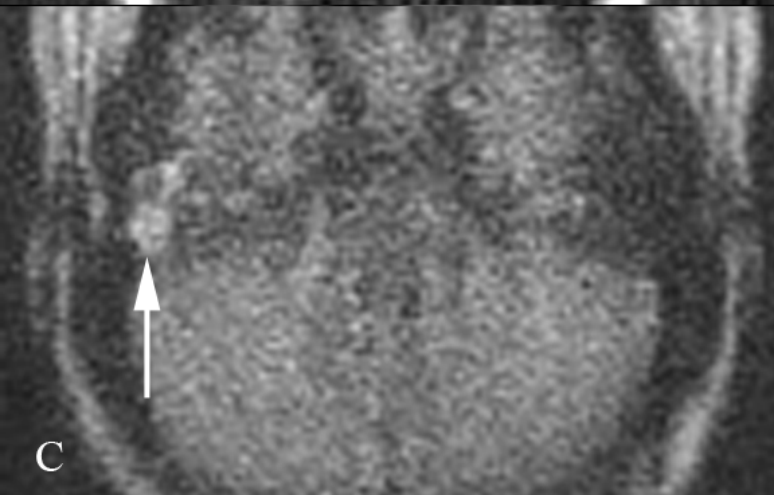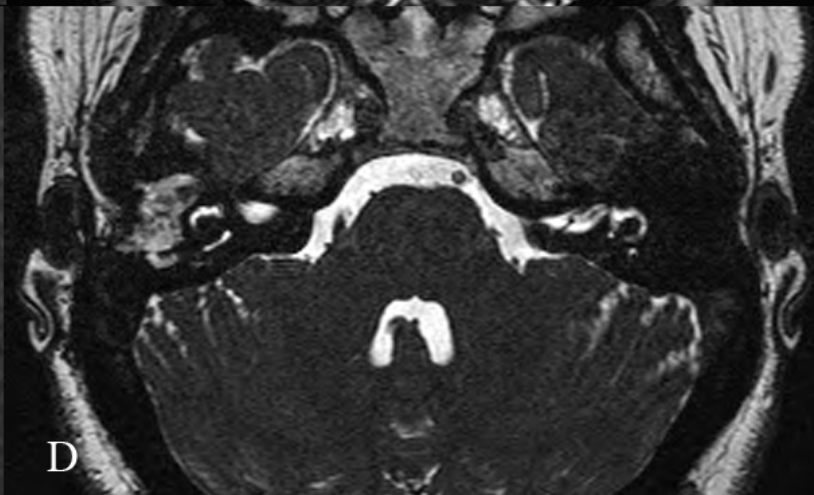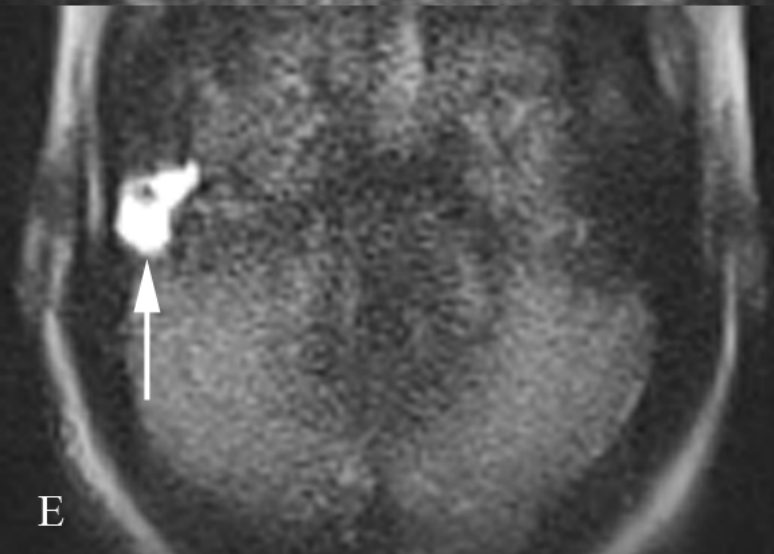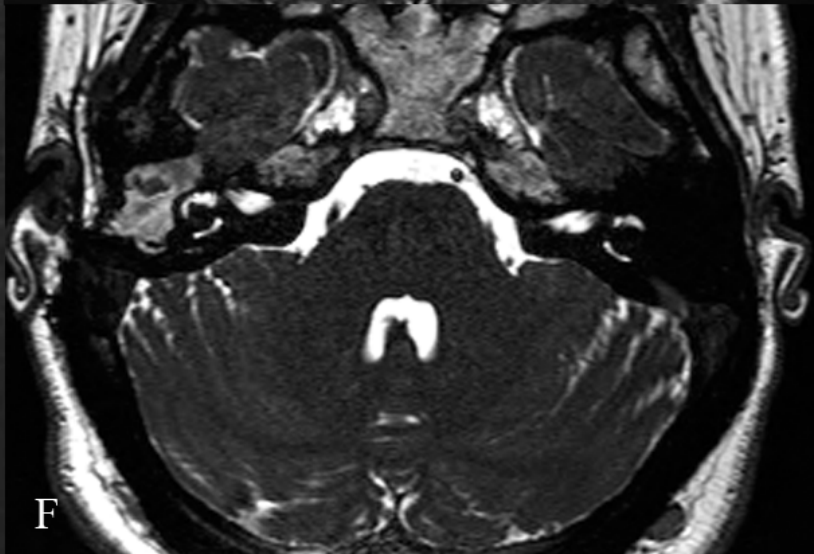

Supplemental material 2 : Example of MRI imaging follow-up of patient 2 (female, 16 years-old, with history of right-sided cholesteatoma)

A, B and C, D: Axial DWI and T2 imaging performed 32 months (A, B) and 40 months (C, D) after the initial surgery. With no significant DWI restriction the imaging findings do not provide evidence of a residual cholesteatoma (A, C, arrows) despite a hyperintense signal in the mastoid cavity on T2 weighted imaging (B, D). E, F: Axial DWI and T2 MRI performed 85 months after the surgery showing evidence of residual cholesteatoma, measured 20x11mm (arrow).
